# Supplementary material for: Host genetics is associated with the gut microbial community membership rather than the structure
Source: Royal Society of Chemistry journal article supplement (doi:10.1039/c5mb00850f), 2016-03-22
Supplement: c5mb00850f1.pdf [file c5mb00850f1.pdf]

***Supplementary Material***

**Host genetics is associated with gut microbial community  
membership rather than structure**

**Peihua Zhao<sup>1</sup>, David M. Irwin<sup>2</sup>, and Dong Dong<sup>1\*</sup>**

<sup>1</sup> Institute of Molecular Ecology and Evolution, SKLEC & IECR, East China Normal University, Shanghai, China

<sup>2</sup> Department of Laboratory Medicine and Pathobiology, University of Toronto, Toronto, Canada.

**\* Correspondence:** Corresponding Author: [ddong.ecnu@gmail.com](mailto:ddong.ecnu@gmail.com)

## Supplementary Figures

**Supplementary Figure 1**

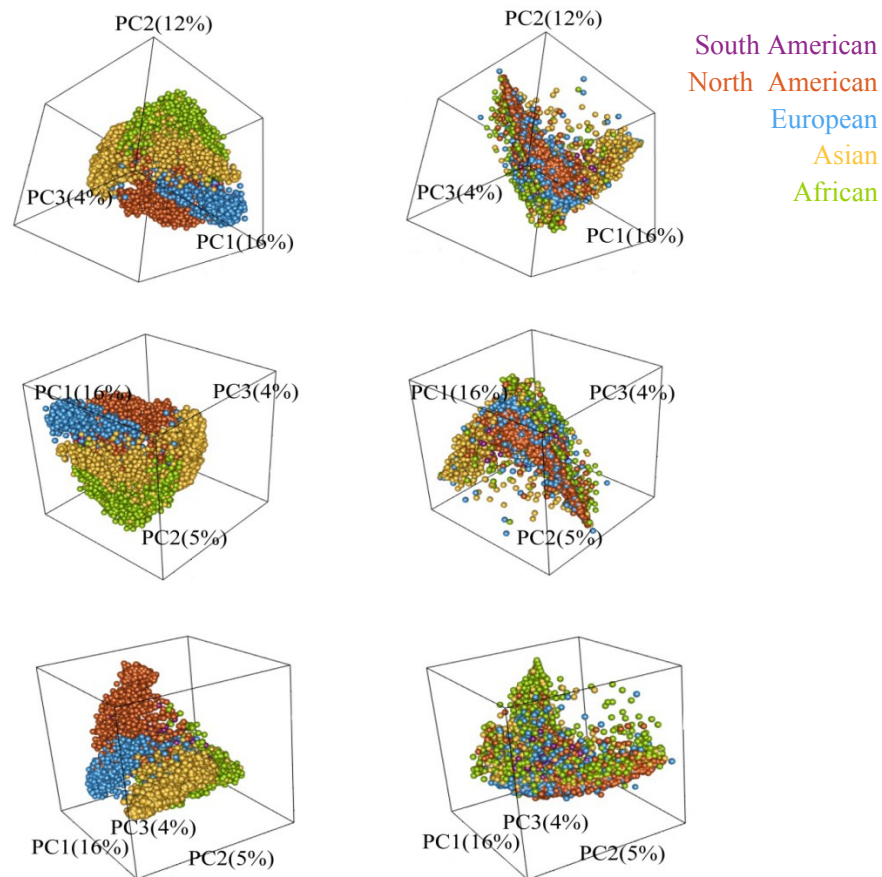

**Supplementary Figure 1** Different views of the PCoA plot, with each row showing the same view angle, left (unweighted) and right (weighted).

**Supplementary Figure 2**

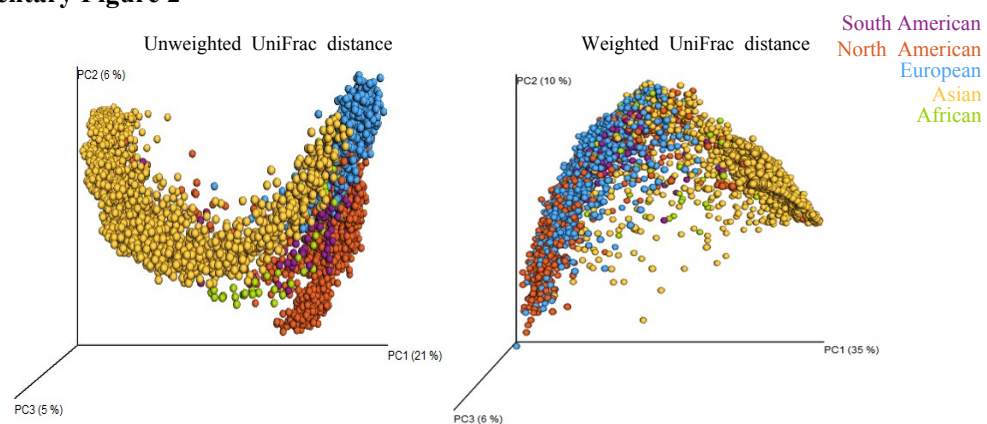

**Supplementary Figure 2** PCoA plots of the unweighted and weighted UniFrac distances of samples generated from the V4 region. ( $P < 0.001$  for the unweighted and weighted UniFrac distances, ANOSIM).

### Supplementary Figure 3

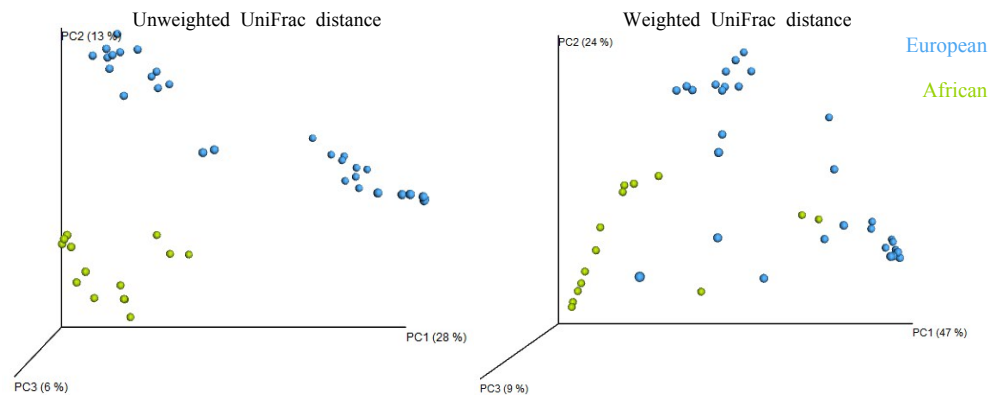

**Supplementary Figure 3 PCoA plots of the unweighted and weighted UniFrac distances of samples generated from the V5-V6 region. ( $P < 0.001$  for the unweighted and weighted UniFrac distances, ANOSIM).**

### Supplementary Figure 4

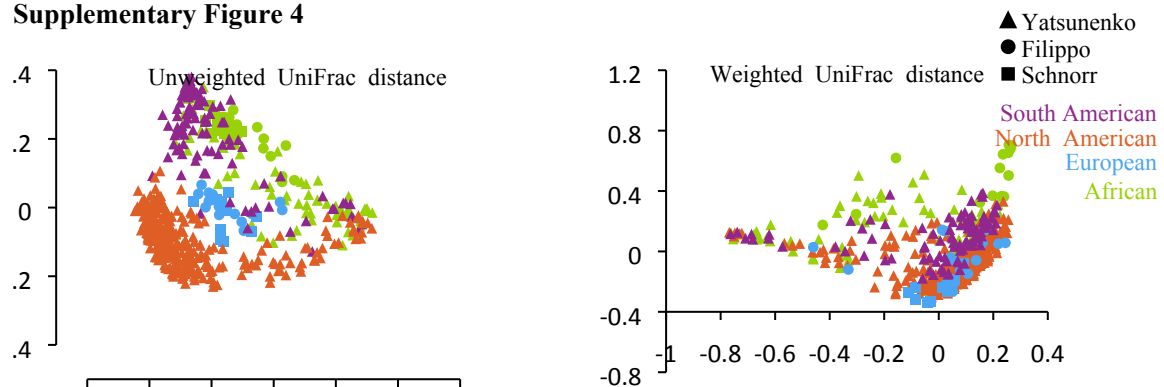

**Supplementary Figure 4 PCoA plots of the unweighted and weighted UniFrac distances of the samples from the combination of the Yatsunenکو, Filippo and Schnorr studies. ( $P < 0.001$  for the unweighted and weighted UniFrac distances, ANOSIM).**

### Supplementary Figure 5

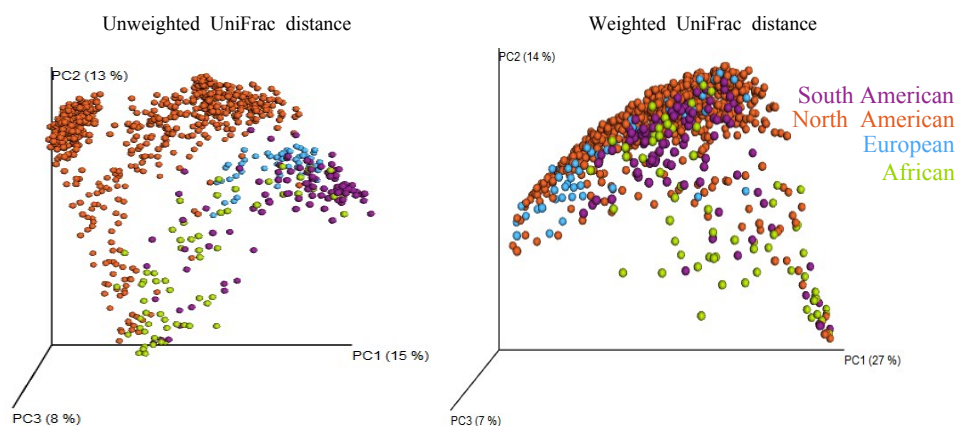

**Supplementary Figure 5 The rarefaction level of 100,000 was used to perform Principal coordinate analysis. ( $P < 0.001$  for the unweighted and weighted UniFrac distances, ANOSIM).**

Supplementary Figure 6

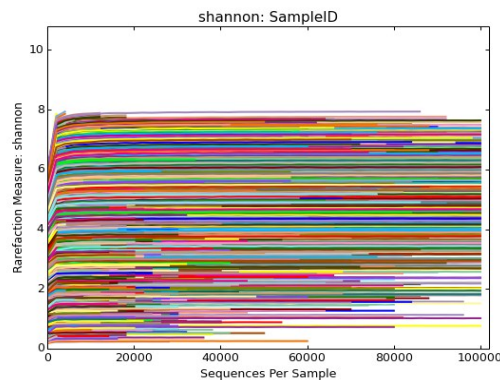

Supplementary Figure 6 Alpha rarefaction curves of all samples with a rarefaction depth of 100,000.

Supplementary Figure 7

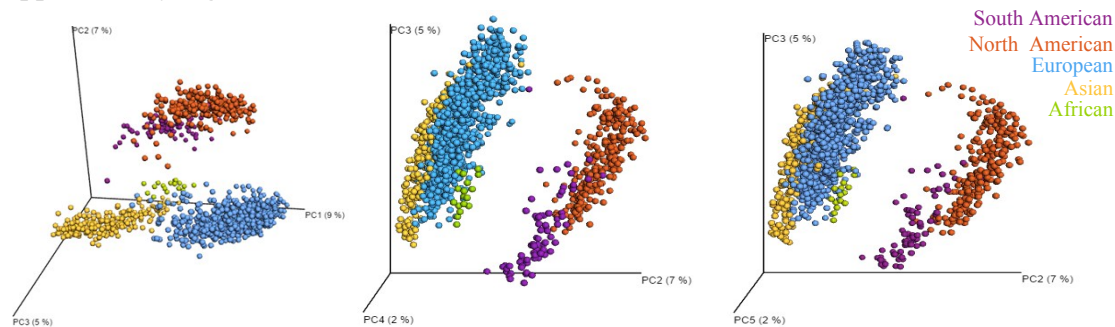

Supplementary Figure 7 PCoA plots of the unweighted UniFrac distances of samples that are normal, generated from V4 region and collected from individuals that are more than 3 years old.

Supplementary Figure 8

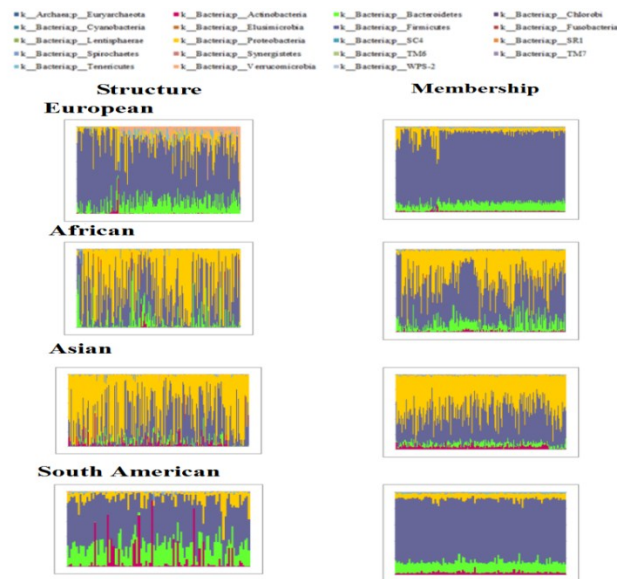

Supplementary Figure 8 Membership and structure of the microbial microbiota in different populations (Asian, European, African, South American).

### Supplementary Figure 9

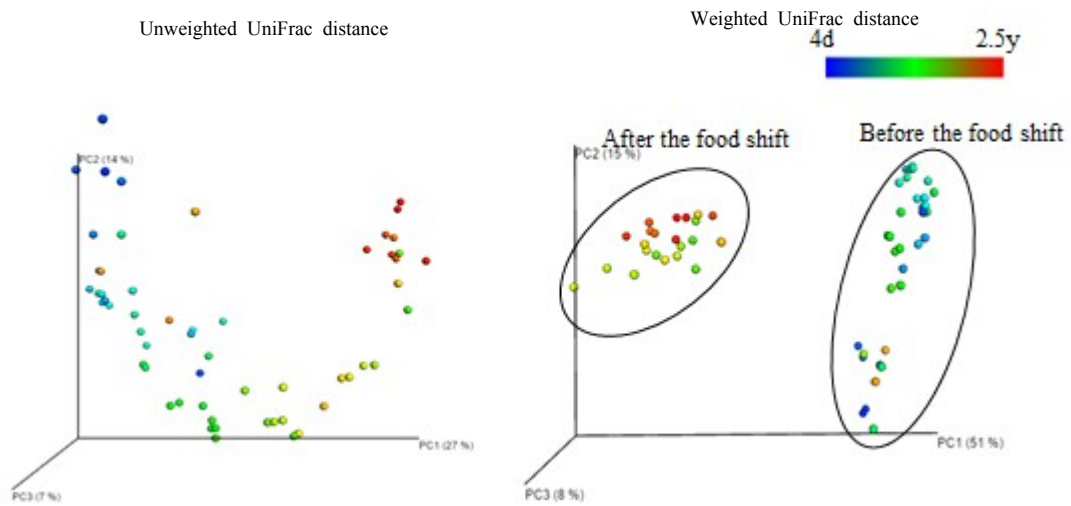

Supplementary Figure 9 PCoA plot of the unweighted and weighted UniFrac distances in a 2.5 y infant.

### Supplementary Figure 10

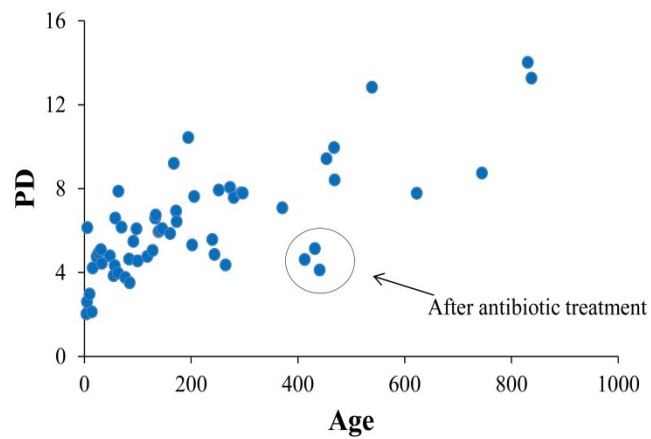

Supplementary Figure 10 Bacterial PD of an infant gut microbiota over time.

## Supplementary table

Table S1 List of studies used.

| <b>Study (PMID)</b> | <b>Population</b>                          | <b>Regions</b> | <b>Sequence platform</b> | <b>Ref</b>              |
|---------------------|--------------------------------------------|----------------|--------------------------|-------------------------|
| 23599893            | North American                             | V2             | Illumina GAIIX           | Song et al. 2013        |
| 24995464            | African,Asian                              | V1-V2          | 454 FLX                  | Pop et al. 2014         |
| 24336217            | North American                             | V4             | Illumina HiSeq           | David et al. 2013       |
| 22606315            | European                                   | V6-V8          | 454 FLX Titanium         | Turroni et al. 2012     |
| 24736369            | African,European                           | V4             | 454 FLX Titanium         | Schnorr et al. 2014     |
| 25146375            | North American                             | V4             | Illumina GAIIX           | David et al. 2014       |
| 22863002            | European                                   | V1-V2          | 454 FLX Titanium         | Koren et al. 2012       |
| 25417156            | European                                   | V4             | Illumina MiSeq           | Goodrich et al. 2014    |
| 22699611            | African, North American,<br>South American | V4             | Illumina HiSeq 2000      | Yatsunenko et al. 2012  |
| 20679230            | African,European                           | V5-V6          | 454 FLX Titanium         | Filippo et al. 2010     |
| 20847294            | North American                             | V1-V3          | 454 FLX Titanium         | Dethlefsen et al. 2011  |
| 24112053            | European                                   | V3-V4          | 454 FLX Titanium         | Avershina et al. 2013   |
| 22957008            | European                                   | V5-V6          | 454 FLX Titanium         | Jost et al. 2012        |
| 24896187            | Asian                                      | V4             | Illumina MiSeq           | Subramanian et al. 2014 |
| 20668239            | North American                             | V2             | 454 FLX                  | Koenig et al. 2011      |
| 21596990            | NA                                         | V2             | 454 FLX                  | Muegge et al. 2011      |
